# Supplementary material for: Screening for Preterm Birth: Potential for a Metabolomics Biomarker Panel
Source: MDPI journal article supplement (doi:10.3390/metabo9050090), 2019-05-07
Supplement: s2 [file s2]

## SUPPLEMENTARY MATERIALS

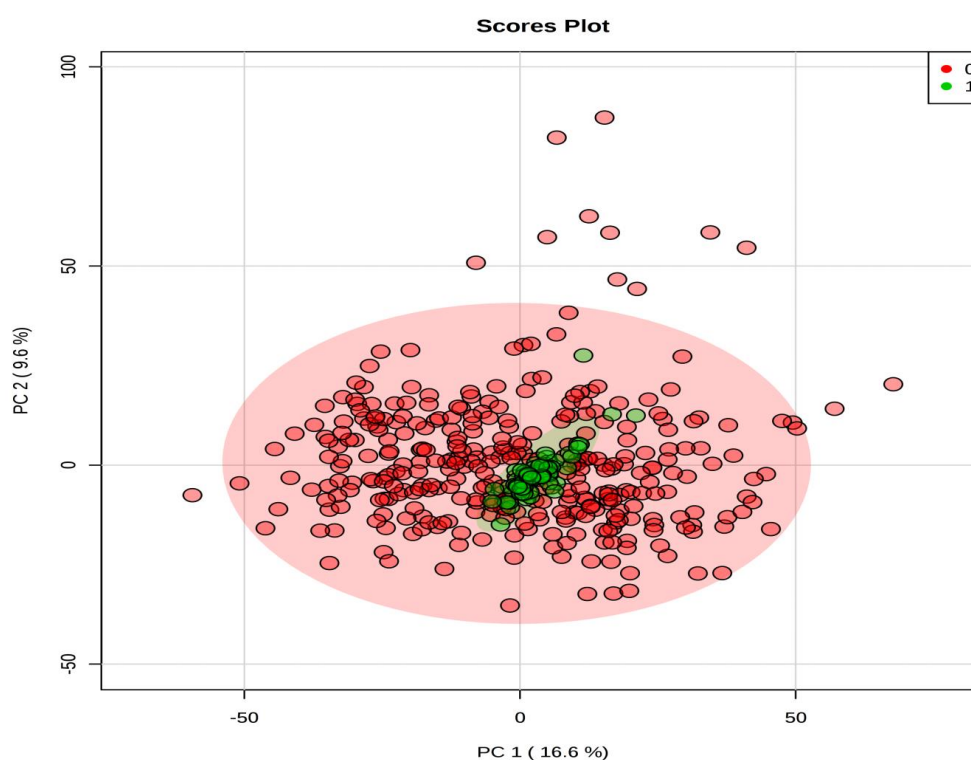

**Figure S1:** PCA score plot of patients (red) and QC samples (green). QC samples are seen to cluster tightly together indicating that the data is of good quality.

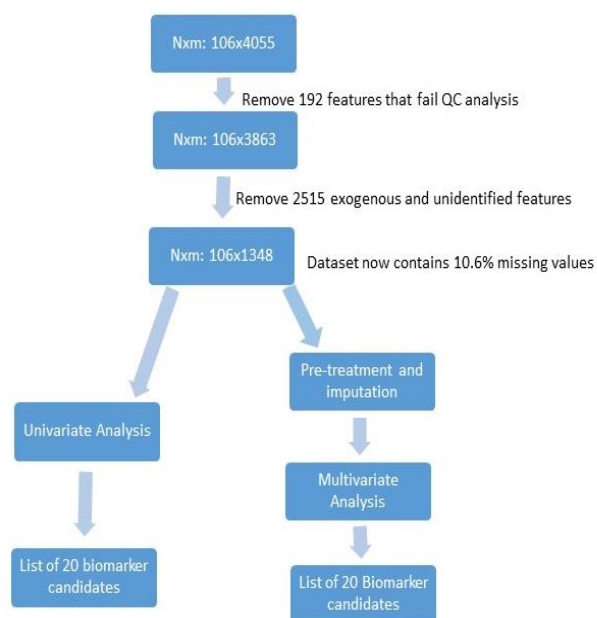

**Figure S2.** Flow of data from raw data stage through data analysis to biomarker candidate lists: 15 weeks dataset: 106 samples (50 cases and 56 controls) x 4055 features.

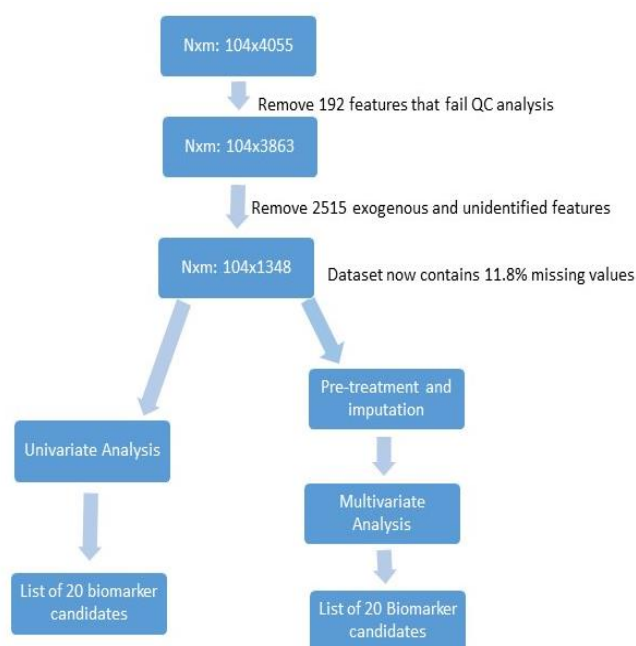

**Figure S3.** Flow of data from raw data stage through data analysis to biomarker candidate lists: 20 weeks dataset: 104 samples (49 cases and 55 controls) x 4055 features.

**Table S1:** Ranked results of univariate (Fold Change) analysis on **15** weeks GA dataset. (VIP scores are not reported as the results of the permutation showed that the PLSDA model was invalid.)

| Rank | Feature | Fold Change | Log 2 Fold Change | Direction of Dysregulation in Cases | % missing values cases | % missing values controls | Biological Grouping | Panel C |
|------|---------|-------------|-------------------|-------------------------------------|------------------------|---------------------------|---------------------|---------|
| 1    | neg_18  | 2.440485    | 1.287168          | UP                                  | 39                     | 45                        | BA                  |         |
| 2    | neg_19  | 2.25624     | 1.173921          | UP                                  | 37                     | 46                        | BA                  |         |
| 3    | neg_20  | 0.514199    | 0.9596            | DOWN                                | 2                      | 5                         | PL                  | *       |
| 4    | neg_21  | 0.563609    | 0.827234          | DOWN                                | 41                     | 50                        | FA                  |         |
| 5    | neg_22  | 0.594372    | 0.750562          | DOWN                                | 6                      | 5                         | AA                  | *       |
| 6    | neg_23  | 0.603438    | 0.728722          | DOWN                                | 18                     | 20                        | PL                  |         |
| 7    | neg_24  | 0.609538    | 0.714212          | DOWN                                | 41                     | 32                        | SP/PP/AA/DA         |         |
| 8    | neg_25  | 0.609667    | 0.713906          | DOWN                                | 41                     | 39                        | DIAG                |         |
| 9    | neg_26  | 1.508704    | 0.59331           | UP                                  | 43                     | 30                        | C21-STR             |         |
| 10   | neg_27  | 0.67683     | 0.563134          | DOWN                                | 35                     | 25                        | ARA/HA/ALC/PO/CAT   |         |
| 11   | neg_28  | 0.693309    | 0.52843           | DOWN                                | 0                      | 0                         | PL                  | *       |

|    |        |              |          |      |    |    |               |   |
|----|--------|--------------|----------|------|----|----|---------------|---|
| 12 | neg_29 | 1.4403<br>32 | 0.526402 | UP   | 24 | 18 | BA            |   |
| 13 | neg_30 | 0.6956<br>96 | 0.523471 | DOWN | 29 | 21 | PL            |   |
| 14 | neg_31 | 0.6980<br>78 | 0.51854  | DOWN | 39 | 43 | VITD &d       |   |
| 15 | neg_32 | 0.7016<br>71 | 0.511133 | DOWN | 0  | 0  | PL            |   |
| 16 | neg_33 | 0.7029<br>33 | 0.50854  | DOWN | 0  | 2  | PL            |   |
| 17 | neg_34 | 1.4173<br>47 | 0.503194 | UP   | 45 | 23 | FA & c/STR &d |   |
| 18 | neg_35 | 0.7060<br>89 | 0.502078 | DOWN | 0  | 0  | PL            |   |
| 19 | neg_36 | 1.4159<br>8  | 0.501801 | UP   | 39 | 52 | PTR           |   |
| 20 | neg_37 | 0.7086<br>61 | 0.496832 | DOWN | 4  | 7  | MOAG          | * |

**Table S2:** Non-parametric test MWU ranked top 20 features from 15 week dataset

| Feature | P-VALUE  | FDR     | % mv<br>in<br>cases | %mv in<br>controls | ID/Biological Grouping | Panel D |
|---------|----------|---------|---------------------|--------------------|------------------------|---------|
| neg_38  | 0.000951 | 0.83074 | 0                   | 0                  | HFA                    | *       |
| neg_39  | 0.002162 | 0.83074 | 0                   | 0                  | IND                    | *       |
| neg_40  | 0.002619 | 0.83074 | 39                  | 59                 | PTR                    |         |
| neg_41  | 0.004049 | 0.83074 | 33                  | 33                 | GLP                    |         |
| neg_42  | 0.004952 | 0.83074 | 16                  | 12                 | VIT D                  |         |
| neg_43  | 0.007468 | 0.83074 | 4                   | 8                  | MOAG                   | *       |
| neg_44  | 0.010098 | 0.83074 | 2                   | 6                  | PL                     | *       |
| neg_45  | 0.010479 | 0.83074 | 24                  | 16                 | VITD/BA/PP             |         |
| neg_46  | 0.010674 | 0.83074 | 37                  | 59                 | PTR                    |         |
| neg_47  | 0.010674 | 0.83074 | 0                   | 0                  | DIAG                   |         |
| neg_48  | 0.0117   | 0.83074 | 2                   | 0                  | MOAG/PL                |         |
| neg_49  | 0.0117   | 0.83074 | 6                   | 6                  | DIAG                   |         |
| neg_50  | 0.012356 | 0.83074 | 10                  | 24                 | N_GLSP                 |         |
| neg_51  | 0.013282 | 0.83074 | 0                   | 0                  | VITD                   |         |
| neg_52  | 0.014016 | 0.83074 | 12                  | 6                  | PL                     |         |
| neg_53  | 0.014269 | 0.83074 | 0                   | 0                  | DIAG                   |         |
| neg_54  | 0.014786 | 0.83074 | 0                   | 0                  | DIAG                   |         |
| neg_55  | 0.014786 | 0.83074 | 0                   | 0                  | DIAG                   |         |
| neg_56  | 0.014786 | 0.83074 | 2                   | 0                  | DIAG                   |         |
| neg_57  | 0.015871 | 0.83074 | 0                   | 0                  | PL                     |         |

**Table S3:** non-parametric test MWU ranked top 20 features from 20 week dataset

| FEATURE | p-value  | FDR     | % MV in<br>cases | % mv in<br>controls | ID/Biological<br>Grouping | Panel B |
|---------|----------|---------|------------------|---------------------|---------------------------|---------|
| neg_58  | 0.000726 | 0.71503 | 0                | 0                   | HFA                       | *       |

|        |          |         |    |    |            |   |
|--------|----------|---------|----|----|------------|---|
| neg_59 | 0.003315 | 0.71503 | 2  | 2  | VITD       | * |
| neg_60 | 0.003757 | 0.71503 | 0  | 0  | FALD       | * |
| neg_61 | 0.003836 | 0.71503 | 20 | 15 | PL         |   |
| neg_62 | 0.005877 | 0.71503 | 28 | 29 | PL         |   |
| neg_63 | 0.005995 | 0.71503 | 26 | 29 | N-ACLA     |   |
| neg_64 | 0.006237 | 0.71503 | 18 | 25 | PP/IND & d |   |
| neg_65 | 0.006237 | 0.71503 | 0  | 2  | PG         | * |
| neg_66 | 0.006882 | 0.71503 | 0  | 0  | HFA/FALD   | * |
| neg_67 | 0.007018 | 0.71503 | 0  | 0  | PL         | * |
| neg_68 | 0.007587 | 0.71503 | 0  | 5  | FA & c     |   |
| neg_69 | 0.008517 | 0.71503 | 2  | 0  | FA & c     |   |
| neg_70 | 0.008849 | 0.71503 | 30 | 40 | OCT        |   |
| neg_71 | 0.008849 | 0.71503 | 44 | 22 | SPM        |   |
| neg_72 | 0.009192 | 0.71503 | 18 | 11 | FA & c     |   |
| neg_73 | 0.009369 | 0.71503 | 0  | 0  | FA & c     |   |
| neg_74 | 0.009548 | 0.71503 | 0  | 0  | PA/A/PO    |   |
| neg_75 | 0.009548 | 0.71503 | 22 | 29 | GLP        |   |
| neg_76 | 0.010104 | 0.71685 | 12 | 16 | DIAG       |   |

15 weeks gestational age dataset: Top features according to Fold Change Ranking

**Figure S4:** neg\_18 at 15 weeks in cases and controls

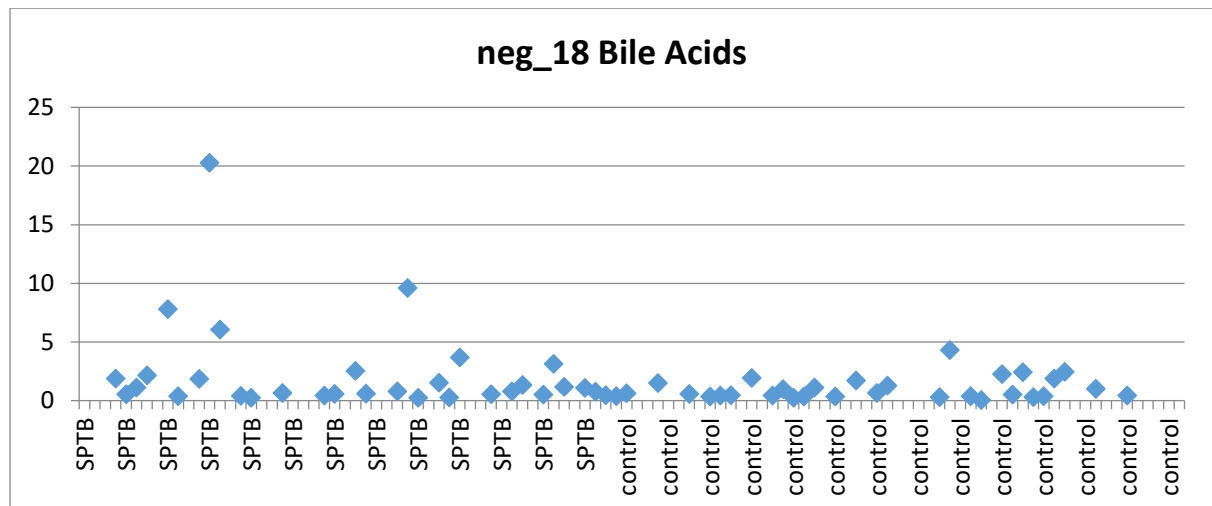

**Figure S5:** neg\_19 at 15 weeks in cases and controls

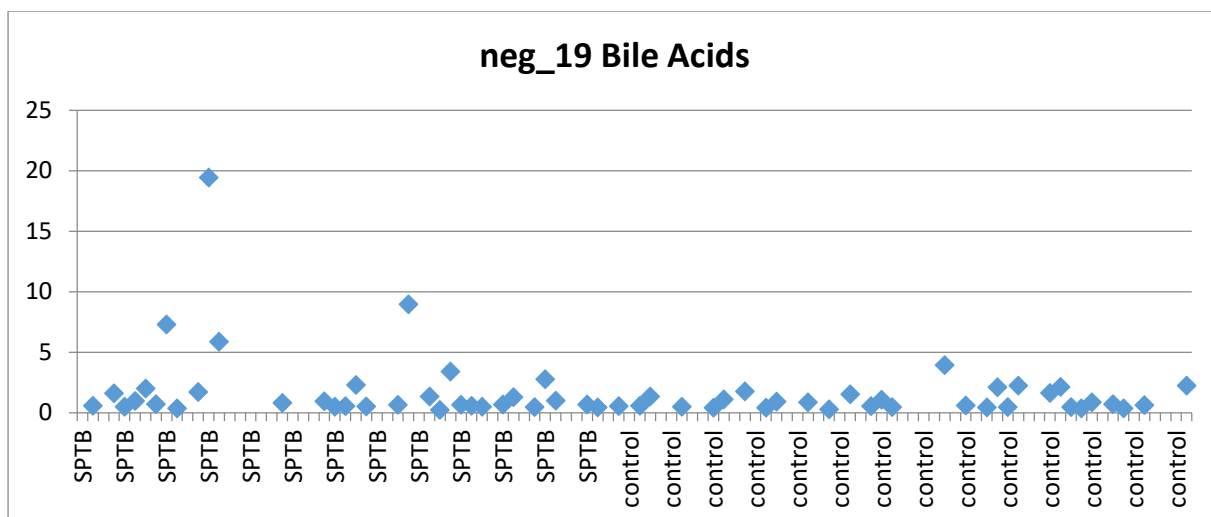

**Figure S6: neg\_20 at 15 weeks in cases and controls**

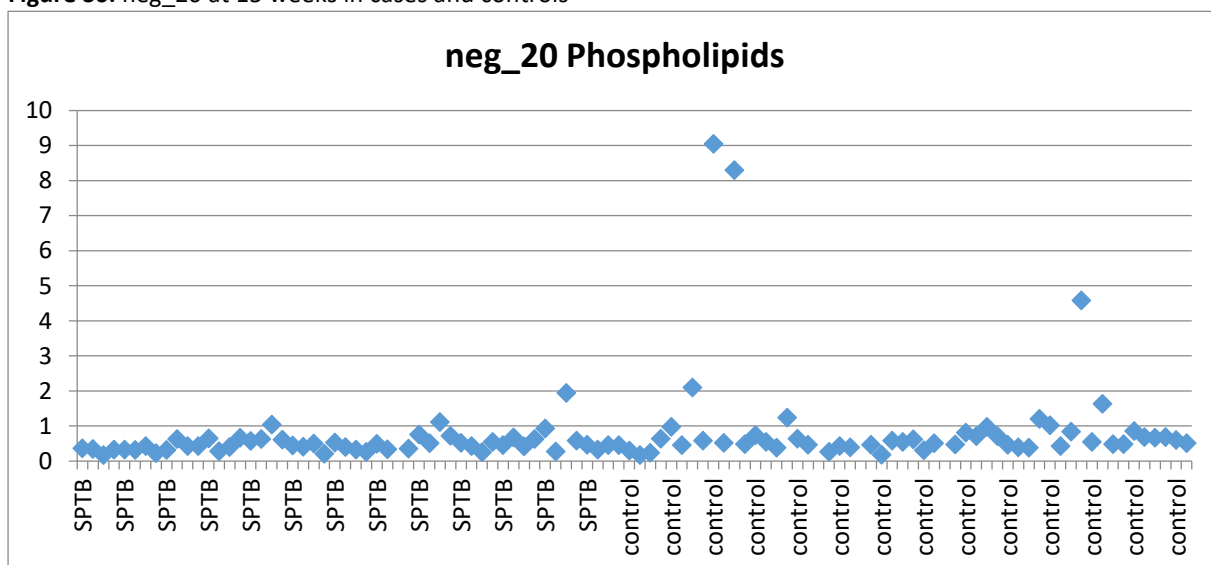

**Figure S7: neg\_21 at 15 weeks in cases and controls**

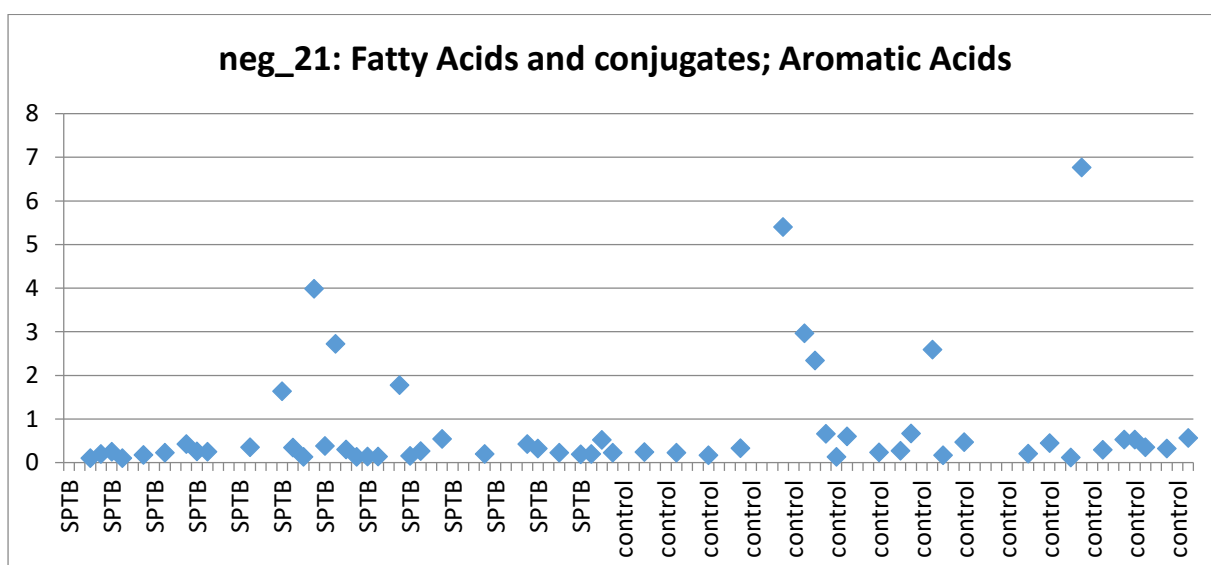

**Figure S8:** neg\_22 at 15 weeks in cases and controls

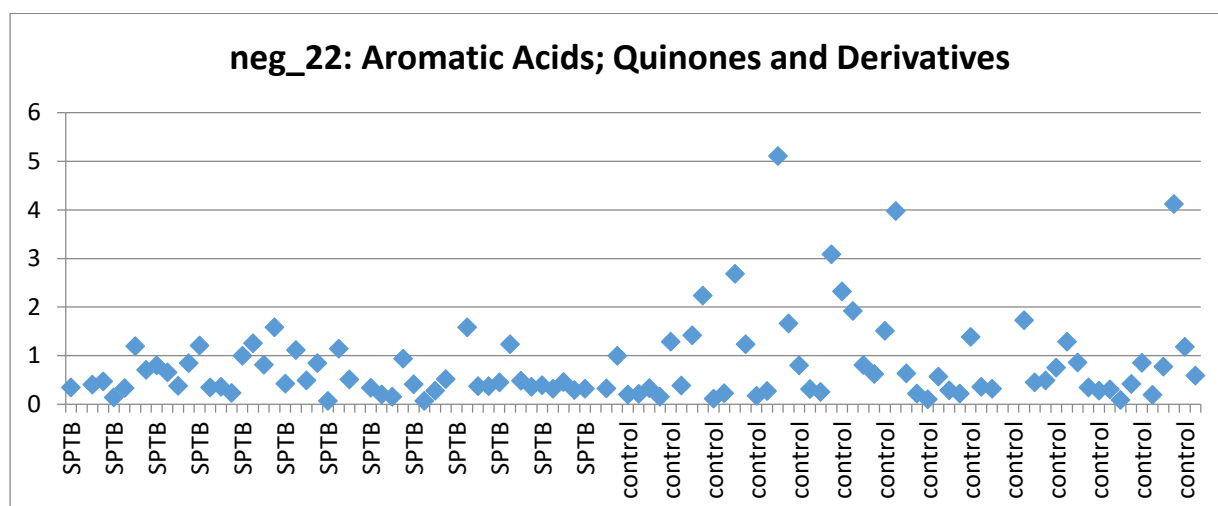

**Figure S9:** neg\_23 at 15 weeks in cases and controls

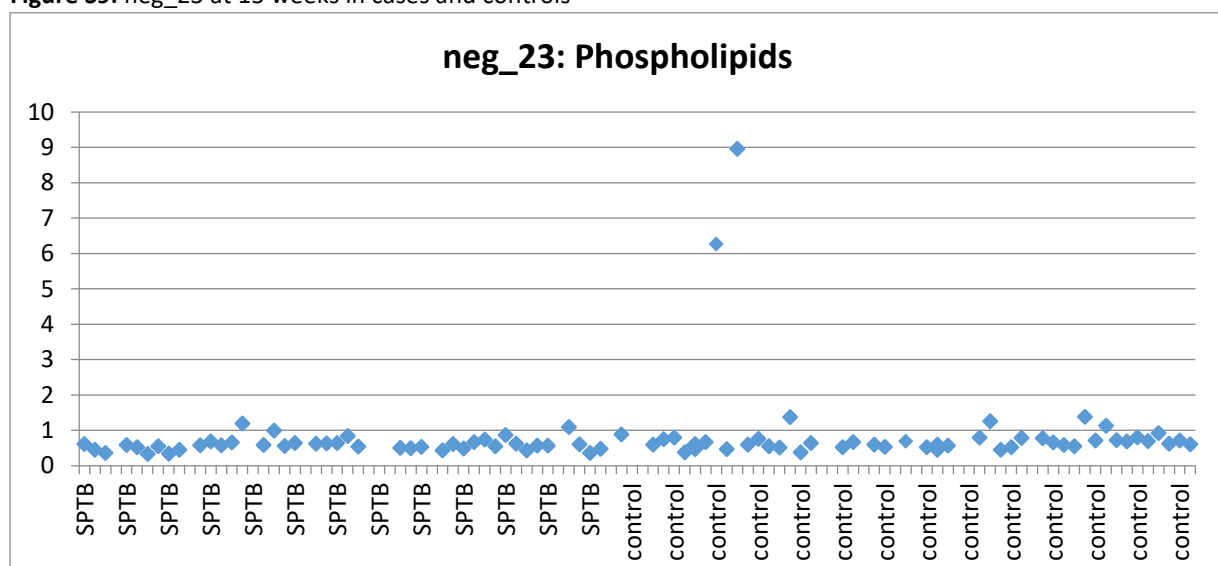

**Figure S10:** neg\_24 at 15 weeks in cases and controls

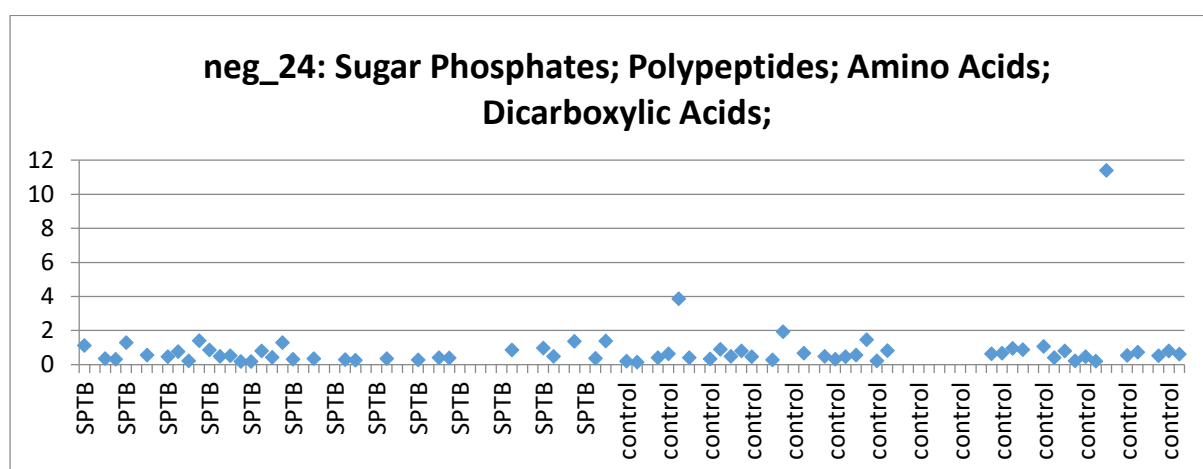

**Figure S11:** neg\_25 at 15 weeks in cases and controls



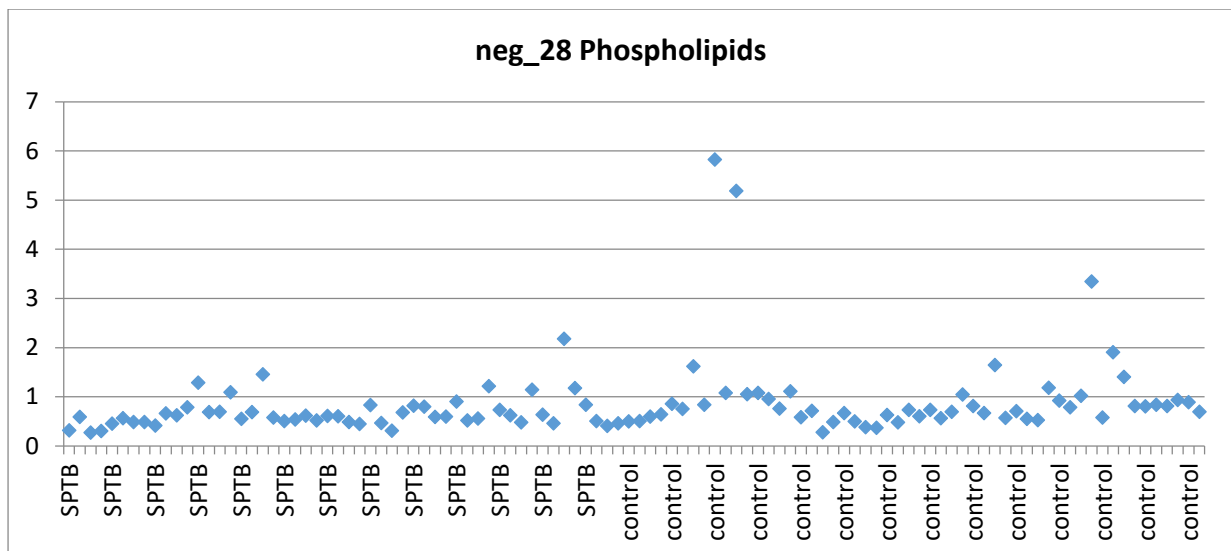

**Figure S15: neg\_29 at 15 weeks in cases and controls**

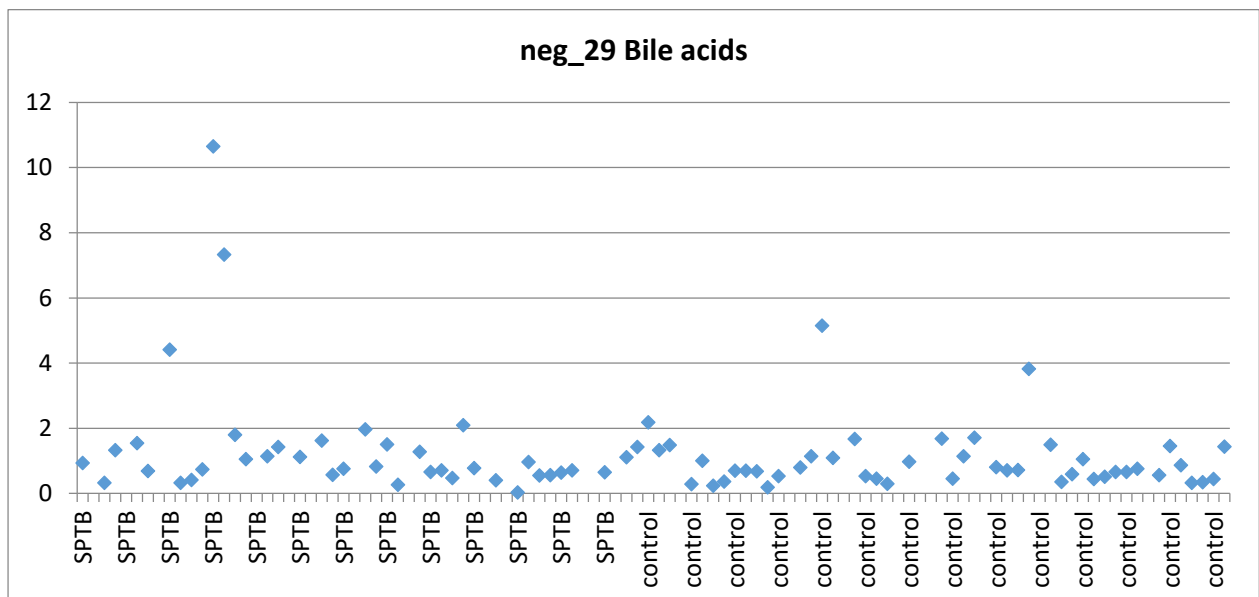

**Figure S16: neg\_30 at 15 weeks in cases and controls**

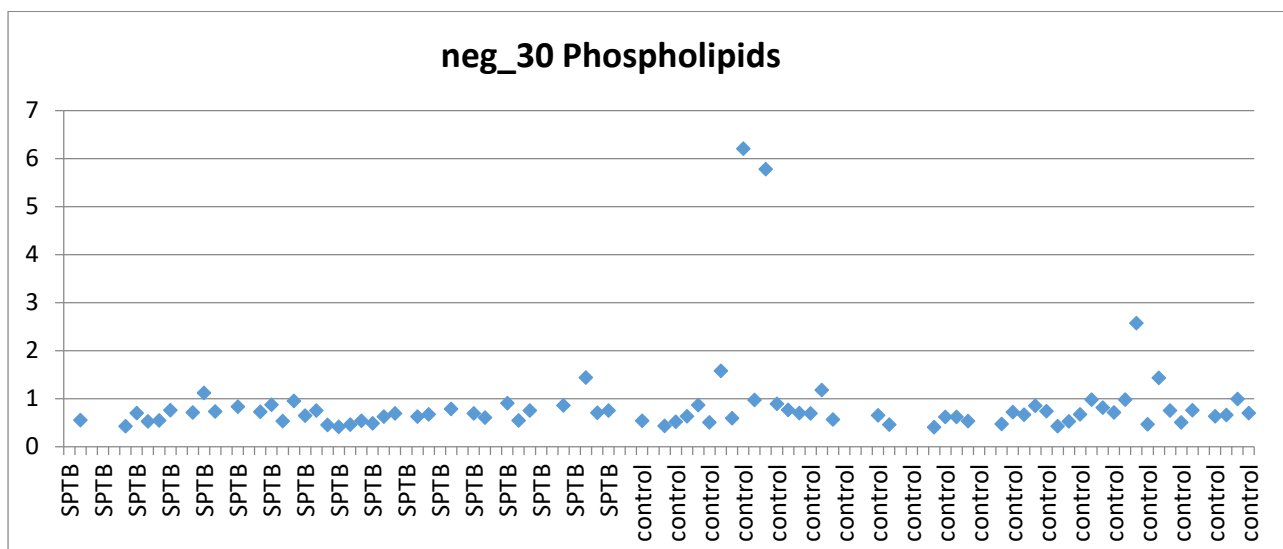



**Figure S17: neg\_31 at 15 weeks in cases and controls**

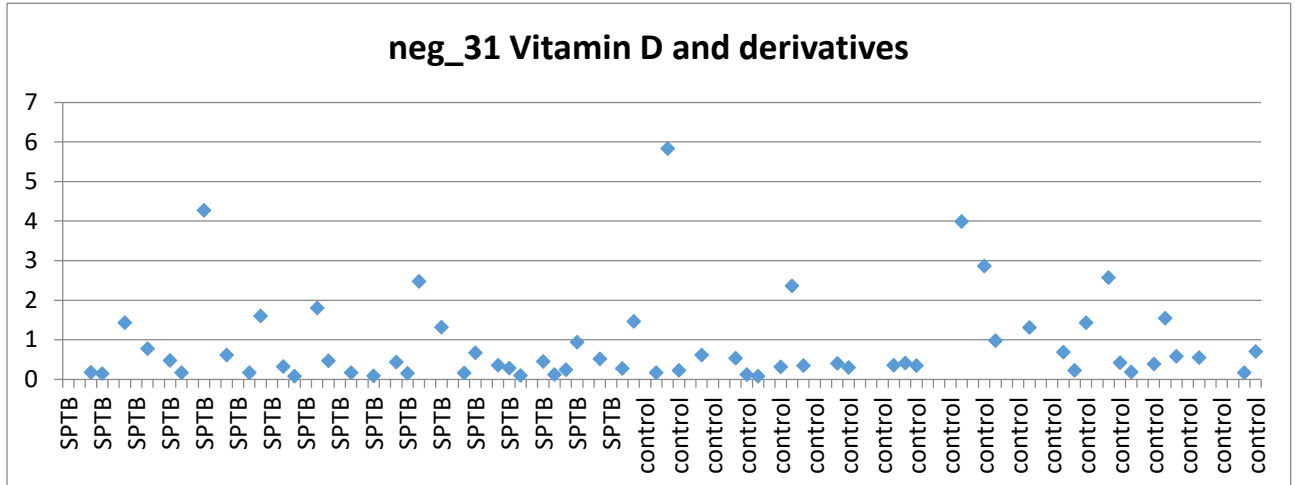

**Figure S18: neg\_32 at 15 weeks in cases and controls**

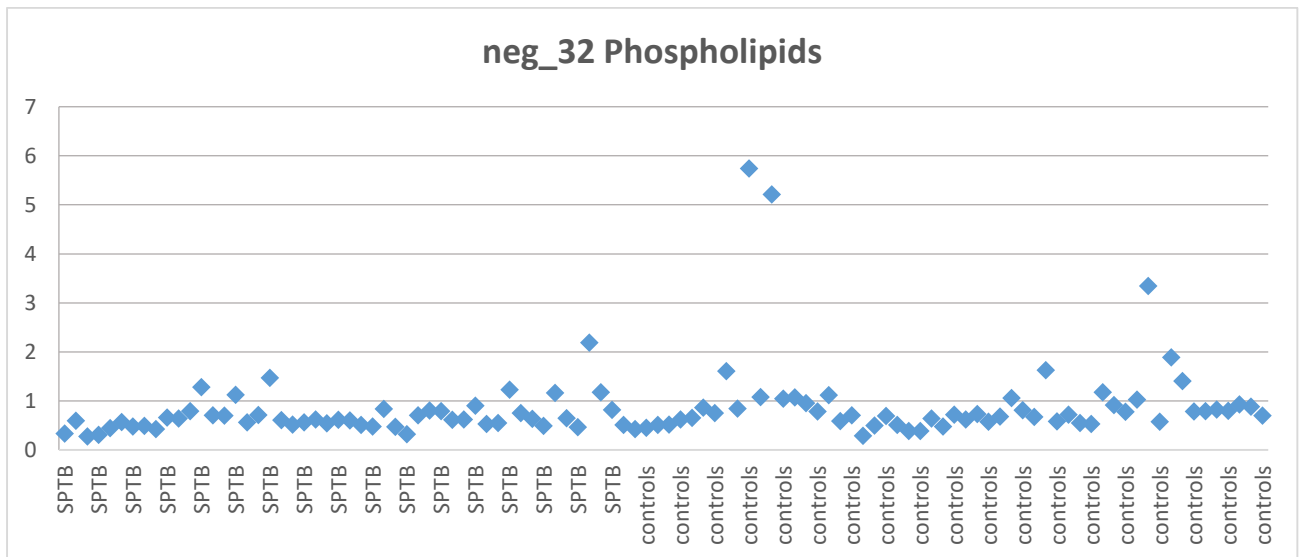

**Figure S19: neg\_33 at 15 weeks in cases and controls**

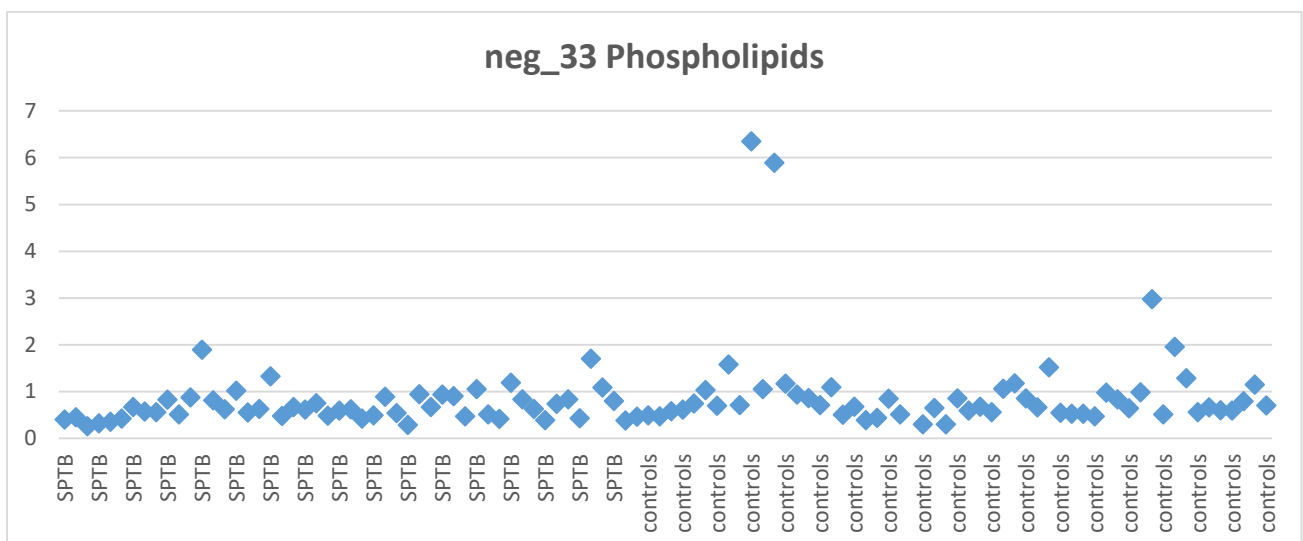

**Figure S20: neg\_34 at 15 weeks in cases and controls**

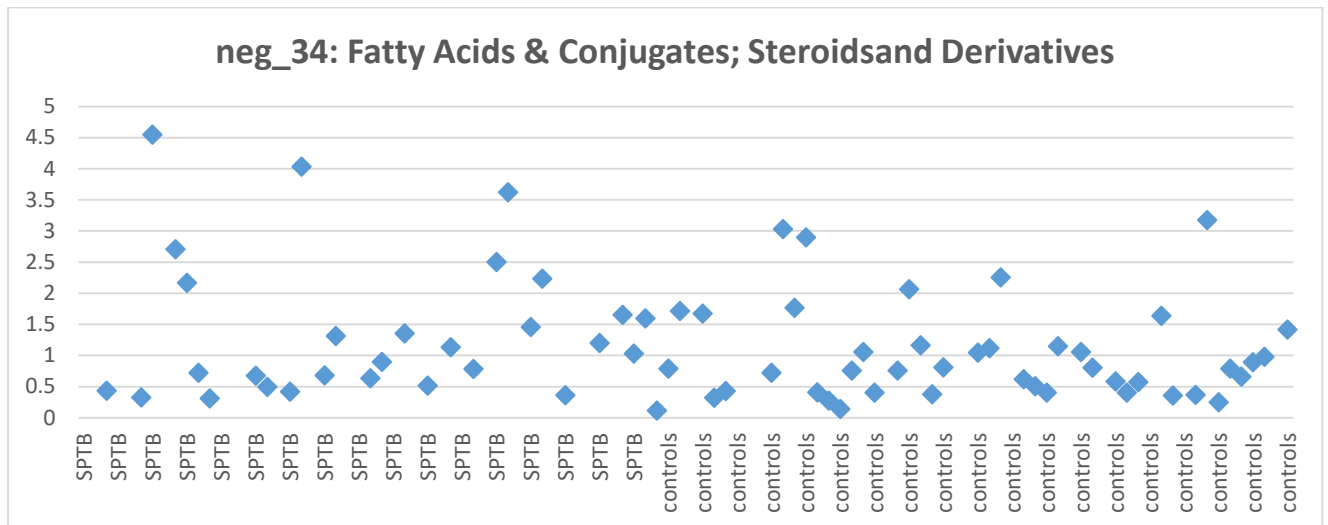

**Figure S21:** neg\_35 at 15 weeks in cases and controls

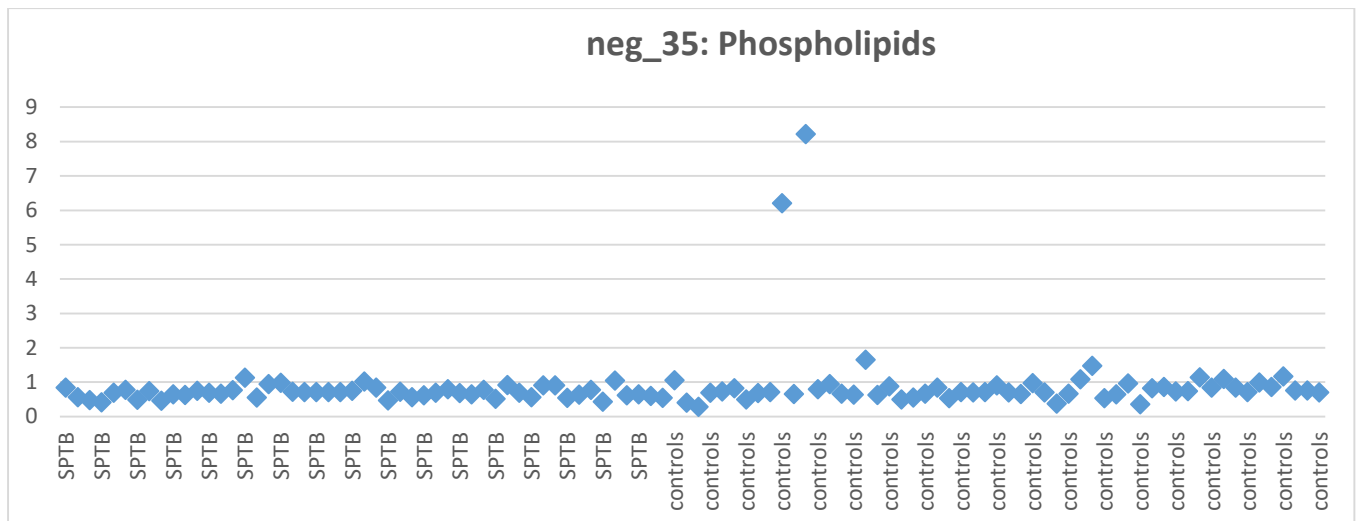

**Figure S22: neg\_36 at 15 weeks in cases and controls**



20 weeks gestational age dataset: Top features according to both Fold Change Ranking and PLSDA and VIP ranking preceded by separate imputation of cases and controls

Figure S24: neg\_1 at 20 weeks in cases and controls

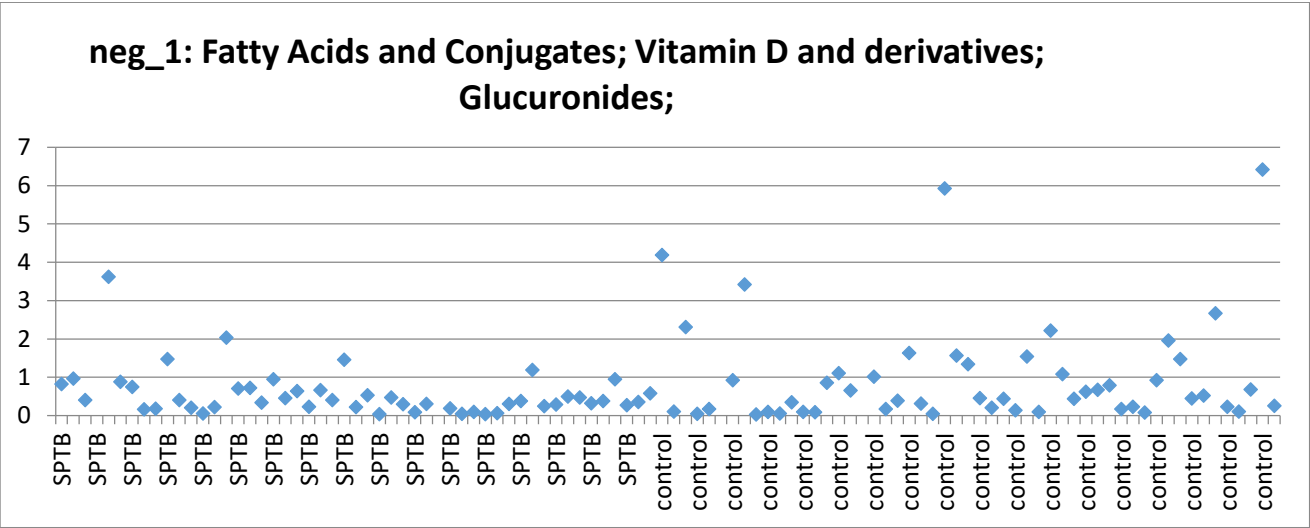

Figure S25: neg\_2 at 20 weeks in cases and controls

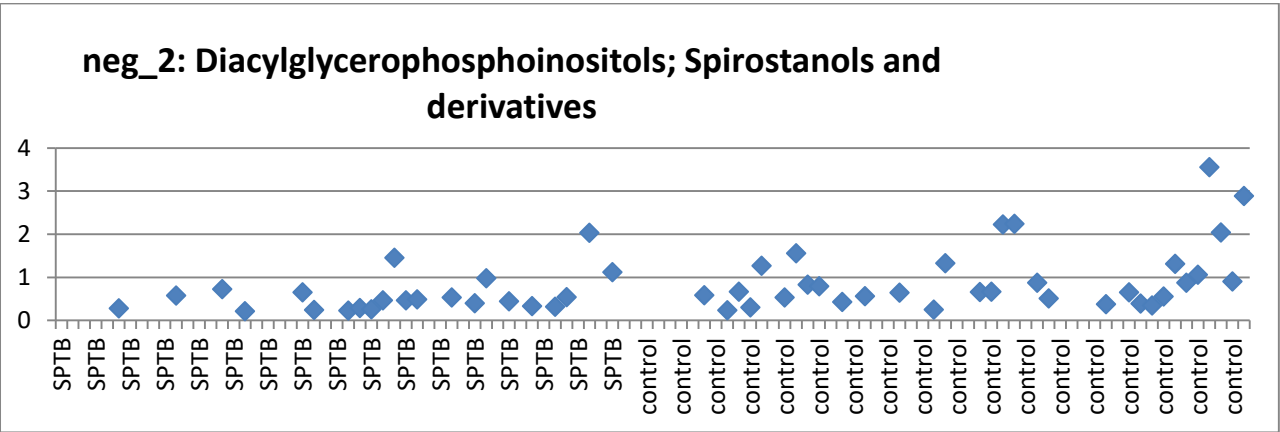

Figure S26: neg\_3 at 20 weeks in cases and controls

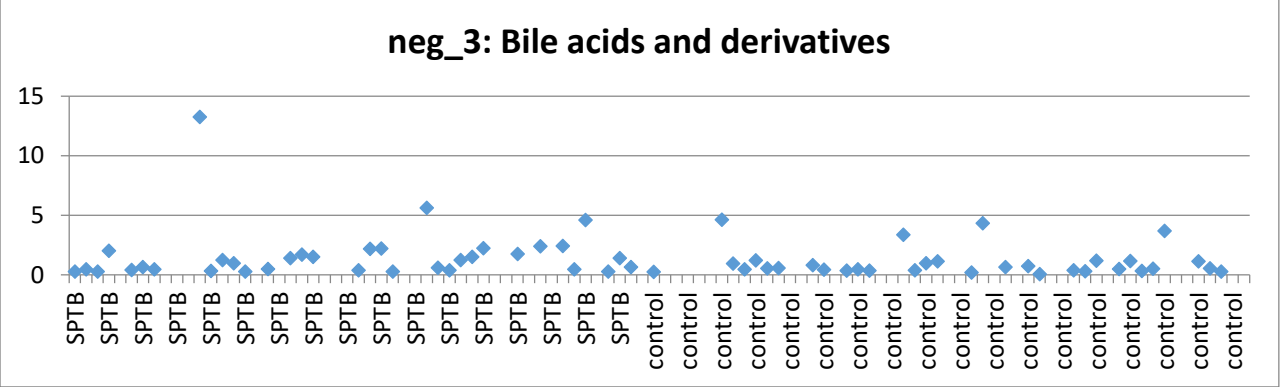

[illegible]

**neg\_5: Bile acids and derivatives**

| Sample  | log2 fold change |
|---------|------------------|
| SPTB    | 0.5              |
| SPTB    | 2.0              |
| SPTB    | 0.8              |
| SPTB    | 0.6              |
| SPTB    | 13.5             |
| SPTB    | 1.5              |
| SPTB    | 1.0              |
| SPTB    | 0.5              |
| SPTB    | 1.8              |
| SPTB    | 1.5              |
| SPTB    | 0.8              |
| SPTB    | 2.2              |
| SPTB    | 2.0              |
| SPTB    | 0.5              |
| SPTB    | 2.2              |
| SPTB    | 2.0              |
| SPTB    | 0.5              |
| SPTB    | 5.5              |
| SPTB    | 0.8              |
| SPTB    | 1.0              |
| SPTB    | 2.2              |
| SPTB    | 0.8              |
| SPTB    | 1.8              |
| SPTB    | 2.5              |
| SPTB    | 4.5              |
| SPTB    | 0.5              |
| SPTB    | 1.5              |
| control | 0.8              |
| control | 0.8              |
| control | 0.5              |
| control | 4.8              |
| control | 1.0              |
| control | 1.5              |
| control | 0.8              |
| control | 0.8              |
| control | 0.5              |
| control | 0.8              |
| control | 3.2              |
| control | 0.5              |
| control | 1.0              |
| control | 1.2              |
| control | 4.5              |
| control | 0.8              |
| control | 0.5              |
| control | 0.8              |
| control | 1.5              |
| control | 0.8              |
| control | 0.5              |
| control | 3.5              |
| control | 0.8              |
| control | 1.0              |
| control | 0.5              |

[illegible]

**Figure S30: neg\_7 at 20 weeks in cases and controls**

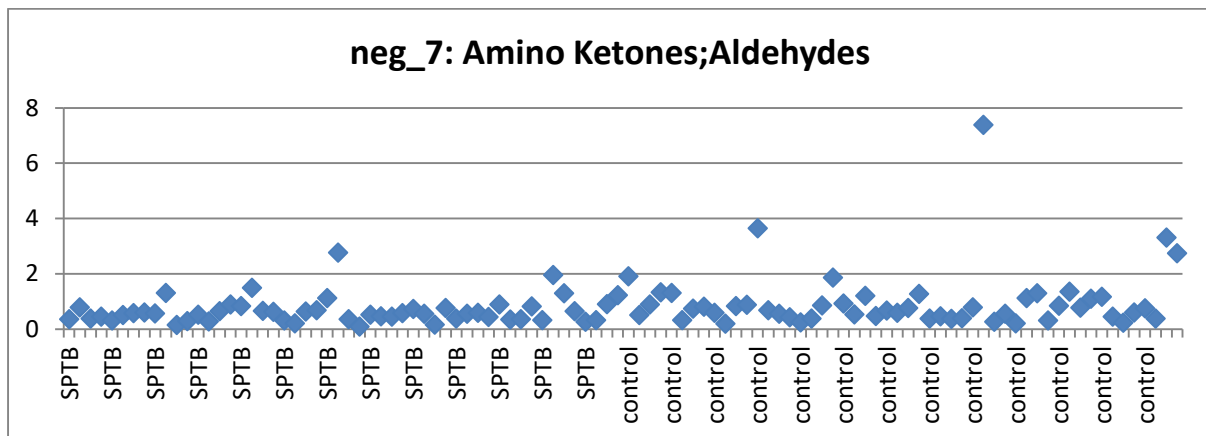

**Figure S31: neg\_8 at 20 weeks in cases and controls**

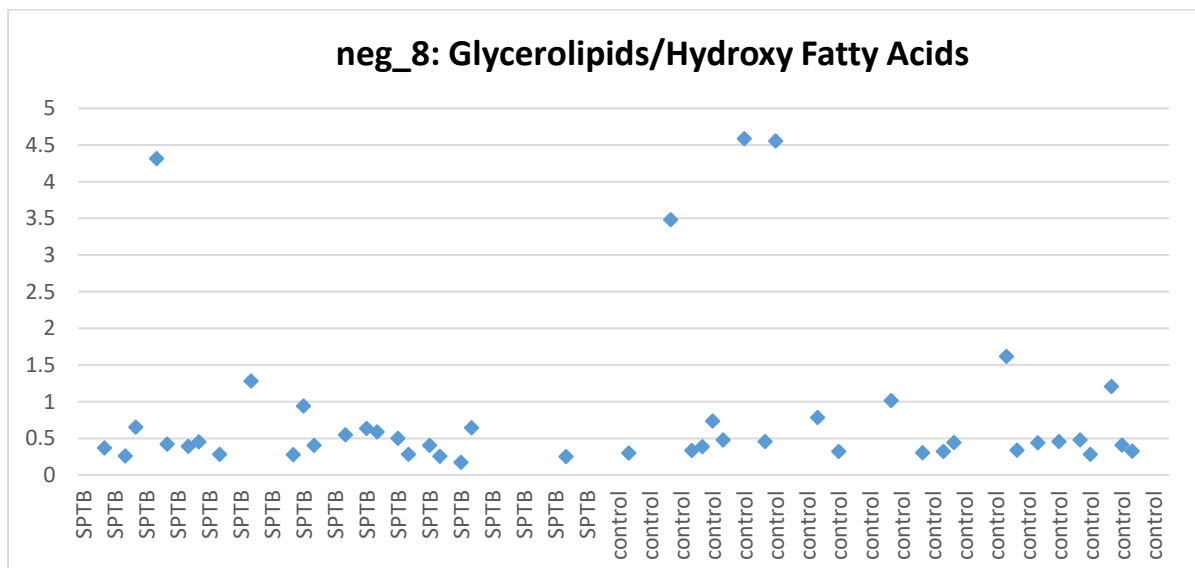

**Figure S32: neg\_9 at 20 weeks in cases and controls**

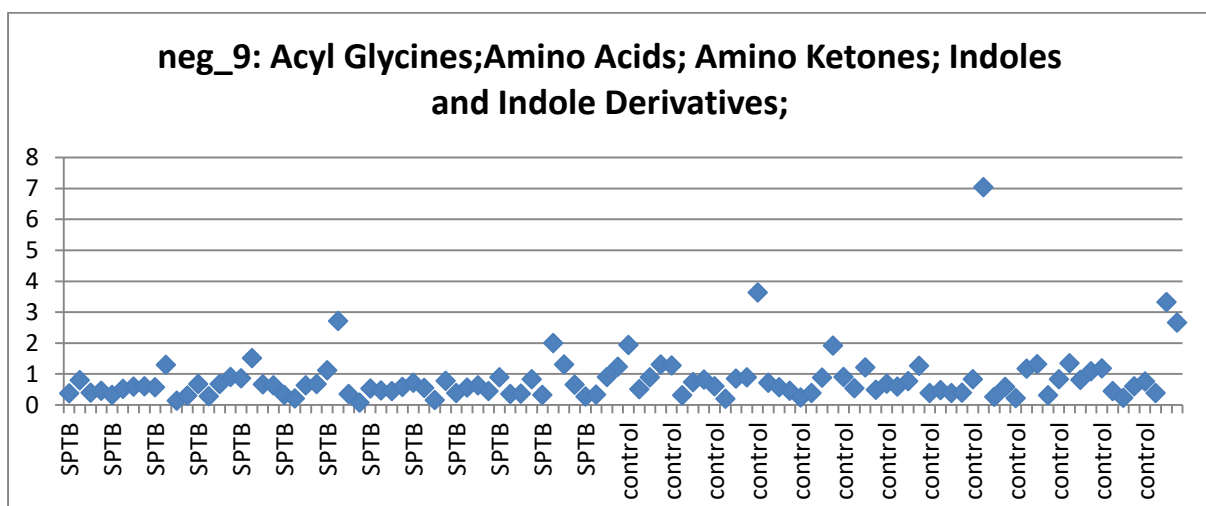

**neg\_10: Fatty Acids and Conjugates**

| Sample  | log2 Fold Change (approx.) |
|---------|----------------------------|
| SPTB    | 0.8                        |
| SPTB    | 0.6                        |
| SPTB    | 1.2                        |
| SPTB    | 0.7                        |
| SPTB    | 1.8                        |
| SPTB    | 0.8                        |
| SPTB    | 1.4                        |
| SPTB    | 0.8                        |
| SPTB    | 1.4                        |
| SPTB    | 2.9                        |
| SPTB    | 1.1                        |
| SPTB    | 0.9                        |
| SPTB    | 1.2                        |
| SPTB    | 0.8                        |
| SPTB    | 1.8                        |
| SPTB    | 1.4                        |
| SPTB    | 0.6                        |
| SPTB    | 9.0                        |
| SPTB    | 0.9                        |
| SPTB    | 1.8                        |
| SPTB    | 0.5                        |
| SPTB    | 1.3                        |
| SPTB    | 1.9                        |
| SPTB    | 0.4                        |
| SPTB    | 7.7                        |
| SPTB    | 0.4                        |
| SPTB    | 0.8                        |
| SPTB    | 0.6                        |
| SPTB    | 1.8                        |
| SPTB    | 3.8                        |
| SPTB    | 0.8                        |
| SPTB    | 1.4                        |
| SPTB    | 0.9                        |
| SPTB    | 1.4                        |
| control | 0.4                        |
| control | 0.8                        |
| control | 0.9                        |
| control | 0.6                        |
| control | 0.8                        |
| control | 0.5                        |
| control | 0.4                        |
| control | 0.6                        |
| control | 1.3                        |
| control | 1.8                        |
| control | 0.5                        |
| control | 1.0                        |
| control | 1.0                        |
| control | 1.0                        |
| control | 1.2                        |
| control | 0.8                        |
| control | 1.0                        |
| control | 0.7                        |
| control | 1.1                        |
| control | 0.6                        |
| control | 1.2                        |
| control | 0.8                        |
| control | 1.1                        |
| control | 0.4                        |
| control | 1.5                        |
| control | 1.0                        |
| control | 6.5                        |
| control | 0.8                        |
| control | 1.9                        |
| control | 0.6                        |
| control | 0.8                        |
| control | 0.5                        |
| control | 2.4                        |
| control | 0.4                        |
| control | 0.8                        |
| control | 0.5                        |
| control | 0.9                        |
| control | 0.8                        |
| control | 0.7                        |

**neg\_11: Acyl Glycines; Amino Acids; Amino Ketones**

| Category | Metabolite | log2 fold change |
|----------|------------|------------------|
| SPTB     | 1          | 0.4              |
| SPTB     | 2          | 0.9              |
| SPTB     | 3          | 0.3              |
| SPTB     | 4          | 0.4              |
| SPTB     | 5          | 0.5              |
| SPTB     | 6          | 0.6              |
| SPTB     | 7          | 0.6              |
| SPTB     | 8          | 0.6              |
| SPTB     | 9          | 1.2              |
| SPTB     | 10         | 0.1              |
| SPTB     | 11         | 0.2              |
| SPTB     | 12         | 0.5              |
| SPTB     | 13         | 0.3              |
| SPTB     | 14         | 0.7              |
| SPTB     | 15         | 1.0              |
| SPTB     | 16         | 1.6              |
| SPTB     | 17         | 0.8              |
| SPTB     | 18         | 0.7              |
| SPTB     | 19         | 0.2              |
| SPTB     | 20         | 0.3              |
| SPTB     | 21         | 0.7              |
| SPTB     | 22         | 1.3              |
| SPTB     | 23         | 0.3              |
| SPTB     | 24         | 0.4              |
| SPTB     | 25         | 0.8              |
| SPTB     | 26         | 0.4              |
| SPTB     | 27         | 0.7              |
| SPTB     | 28         | 0.4              |
| SPTB     | 29         | 0.8              |
| SPTB     | 30         | 0.4              |
| SPTB     | 31         | 0.3              |
| SPTB     | 32         | 0.9              |
| SPTB     | 33         | 0.4              |
| SPTB     | 34         | 0.7              |
| SPTB     | 35         | 0.4              |
| SPTB     | 36         | 0.3              |
| SPTB     | 37         | 0.9              |
| SPTB     | 38         | 0.3              |
| SPTB     | 39         | 0.7              |
| SPTB     | 40         | 0.3              |
| SPTB     | 41         | 0.9              |
| SPTB     | 42         | 0.3              |
| SPTB     | 43         | 0.7              |
| SPTB     | 44         | 0.3              |
| SPTB     | 45         | 0.9              |
| SPTB     | 46         | 0.3              |
| SPTB     | 47         | 0.7              |
| SPTB     | 48         | 0.3              |
| SPTB     | 49         | 0.9              |
| SPTB     | 50         | 0.3              |
| SPTB     | 51         | 0.7              |
| SPTB     | 52         | 0.3              |
| SPTB     | 53         | 0.9              |
| SPTB     | 54         | 0.3              |
| SPTB     | 55         | 0.7              |
| SPTB     | 56         | 0.3              |
| SPTB     | 57         | 0.9              |
| SPTB     | 58         | 0.3              |
| SPTB     | 59         | 0.7              |
| SPTB     | 60         | 0.3              |
| SPTB     | 61         | 0.9              |
| SPTB     | 62         | 0.3              |
| SPTB     | 63         | 0.7              |
| SPTB     | 64         | 0.3              |
| SPTB     | 65         | 0.9              |
| SPTB     | 66         | 0.3              |
| SPTB     | 67         | 0.7              |
| SPTB     | 68         | 0.3              |
| SPTB     | 69         | 0.9              |
| SPTB     | 70         | 0.3              |
| SPTB     | 71         | 0.7              |
| SPTB     | 72         | 0.3              |
| SPTB     | 73         | 0.9              |
| SPTB     | 74         | 0.3              |
| SPTB     | 75         | 0.7              |
| SPTB     | 76         | 0.3              |
| SPTB     | 77         | 0.9              |
| SPTB     | 78         | 0.3              |
| SPTB     | 79         | 0.7              |
| SPTB     | 80         | 0.3              |
| SPTB     | 81         | 0.9              |
| SPTB     | 82         | 0.3              |
| SPTB     | 83         | 0.7              |
| SPTB     | 84         | 0.3              |
| SPTB     | 85         | 0.9              |
| SPTB     | 86         | 0.3              |
| SPTB     | 87         | 0.7              |
| SPTB     | 88         | 0.3              |
| SPTB     | 89         | 0.9              |
| SPTB     | 90         | 0.3              |
| SPTB     | 91         | 0.7              |
| SPTB     | 92         | 0.3              |
| SPTB     | 93         | 0.9              |
| SPTB     | 94         | 0.3              |
| SPTB     | 95         | 0.7              |
| SPTB     | 96         | 0.3              |
| SPTB     | 97         | 0.9              |
| SPTB     | 98         | 0.3              |
| SPTB     | 99         | 0.7              |
| SPTB     | 100        | 0.3              |
| SPTB     | 101        | 0.9              |
| SPTB     | 102        | 0.3              |
| SPTB     | 103        | 0.7              |
| SPTB     | 104        | 0.3              |
| SPTB     | 105        | 0.9              |
| SPTB     | 106        | 0.3              |
| SPTB     | 107        | 0.7              |
| SPTB     | 108        | 0.3              |
| SPTB     | 109        | 0.9              |
| SPTB     | 110        | 0.3              |
| SPTB     | 111        | 0.7              |
| SPTB     | 112        | 0.3              |
| SPTB     | 113        | 0.9              |
| SPTB     | 114        | 0.3              |
| SPTB     | 115        | 0.7              |
| SPTB     | 116        | 0.3              |
| SPTB     | 117        | 0.9              |
| SPTB     | 118        | 0.3              |
| SPTB     | 119        | 0.7              |
| SPTB     | 120        | 0.3              |
| SPTB     | 121        | 0.9              |
| SPTB     | 122        | 0.3              |
| SPTB     | 123        | 0.7              |
| SPTB     | 124        | 0.3              |
| SPTB     | 125        | 0.9              |
| SPTB     | 126        | 0.3              |
| SPTB     | 127        | 0.7              |
| SPTB     | 128        | 0.3              |
| SPTB     | 129        | 0.9              |
| SPTB     | 130        | 0.3              |
| SPTB     | 131        | 0.7              |
| SPTB     | 132        | 0.3              |
| SPTB     | 133        | 0.9              |
| SPTB     | 134        | 0.3              |
| SPTB     | 135        | 0.7              |
| SPTB     | 136        | 0.3              |
| SPTB     | 137        | 0.9              |
| SPTB     | 138        | 0.3              |
| SPTB     | 139        | 0.7              |
| SPTB     | 140        | 0.3              |
| SPTB     | 141        | 0.9              |
| SPTB     | 142        | 0.3              |
| SPTB     | 143        | 0.7              |
| SPTB     | 144        | 0.3              |
| SPT      |            |                  |

[illegible]

**Figure S36: neg\_13 at 20 weeks in cases and controls**

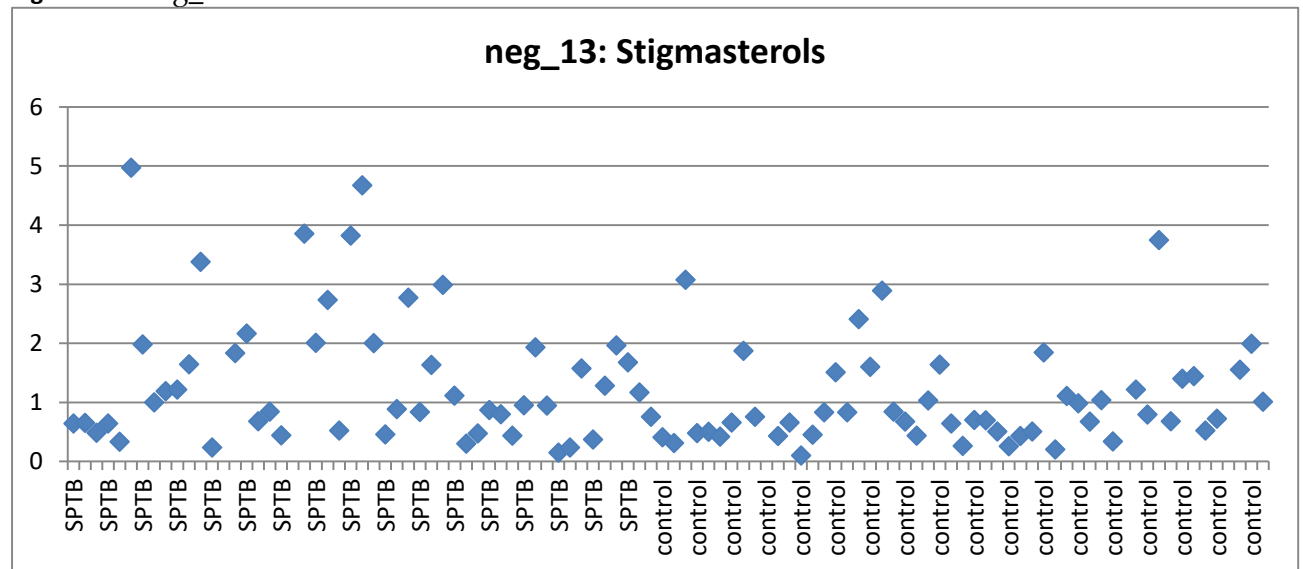

**Figure S37: neg\_14 at 20 weeks in cases and controls**

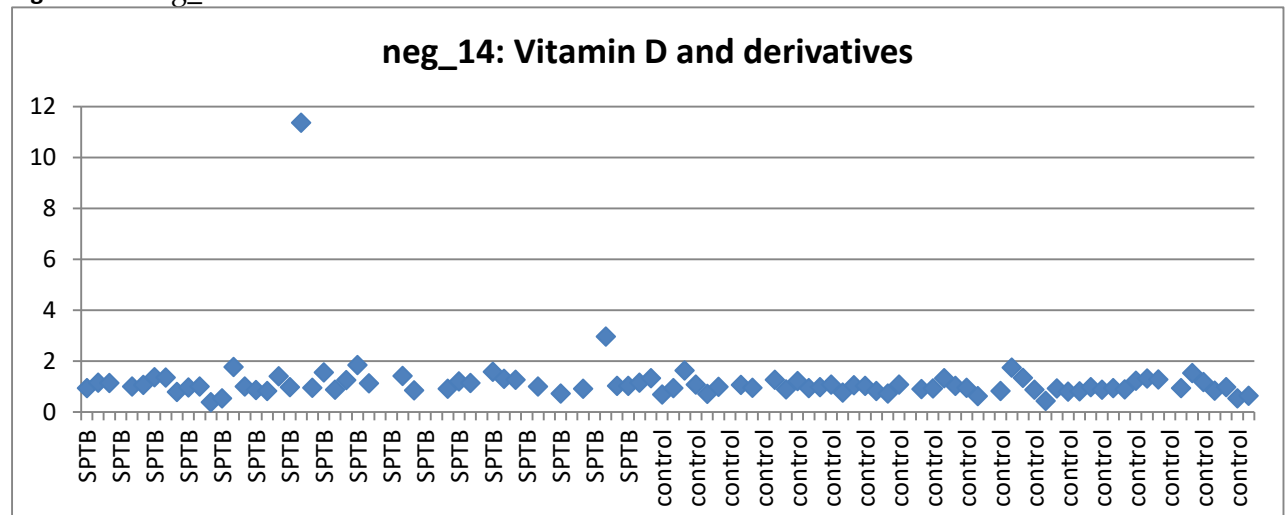

**Figure S38: neg\_15 at 20 weeks in cases and controls**

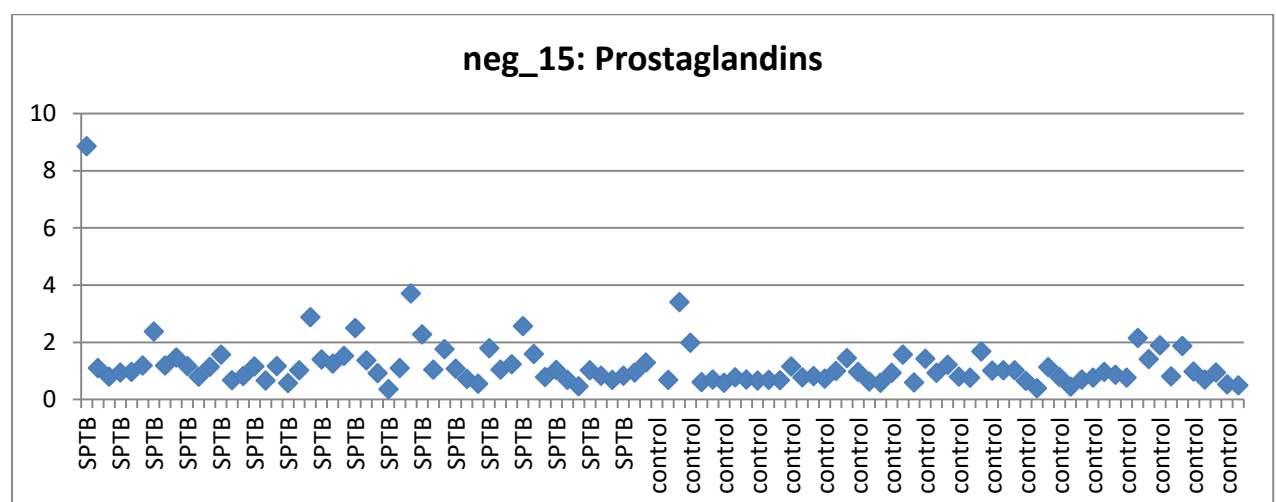



**Figure S39: neg\_16 at 20 weeks in cases and controls**

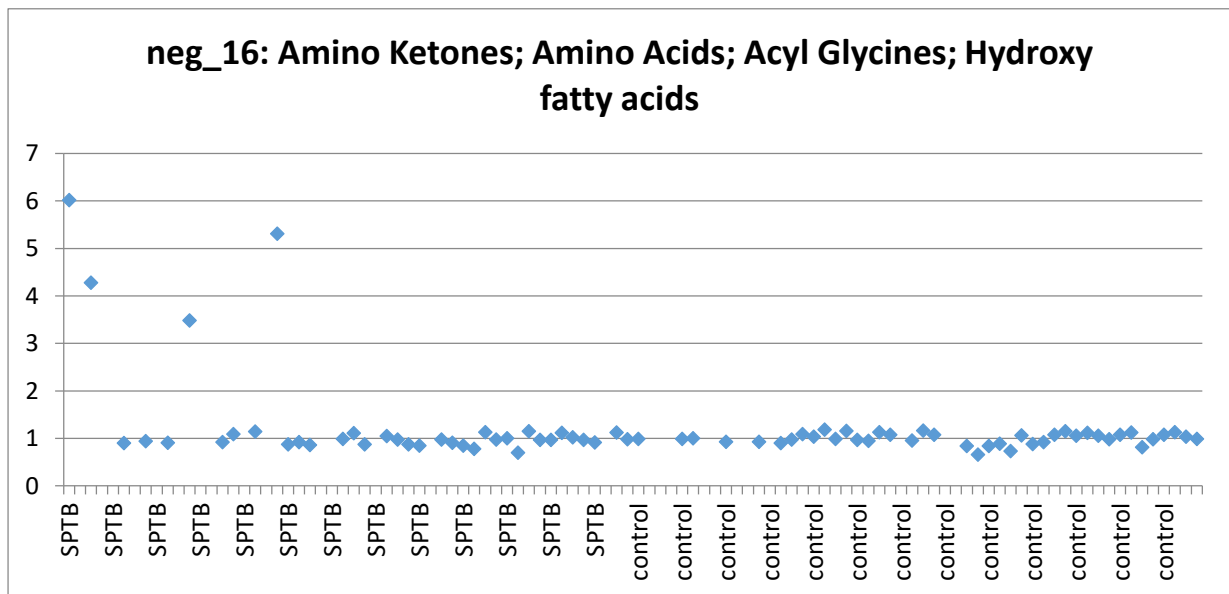

**Figure S40: neg\_17 at 20 weeks in cases and controls**

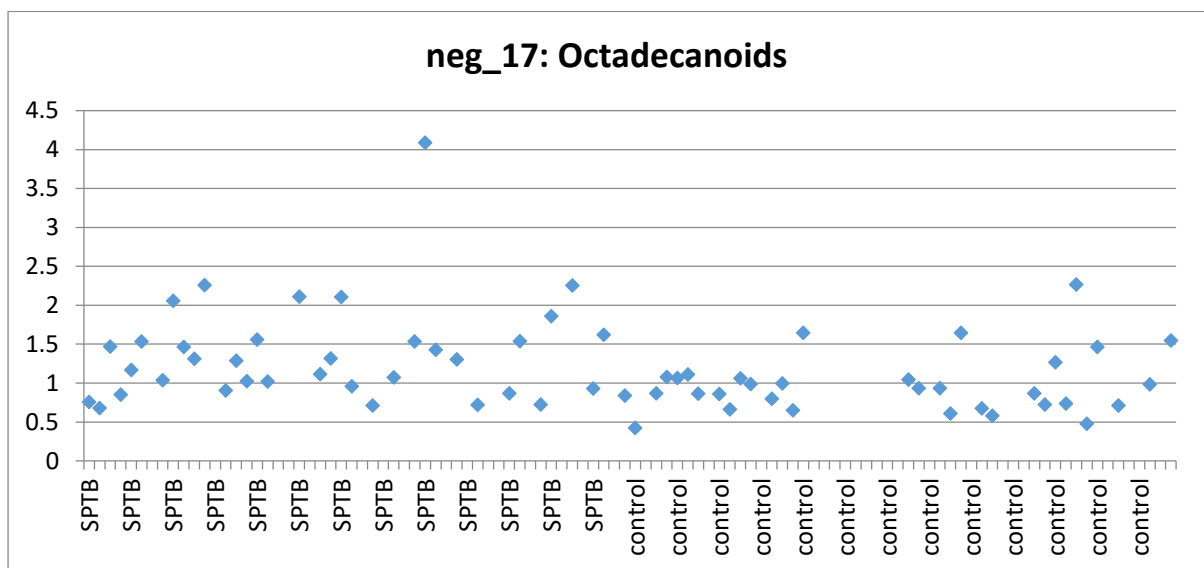

**Table S4:** Missing value % in 15 week dataset candidate lists and panels assessed by Panelomix

| 15 week dataset | Top 20 rank by FC | Top 20 rank MWU | Panel D | Panel E |
|-----------------|-------------------|-----------------|---------|---------|
| CASES           | 24                | 9               | 3       | 2       |
| CONTROLS        | 23                | 11              | 4       | 4       |
| OVERALL         | 24                | 10              | 4       | 3       |

**Table S5:** Missing value % in 20 week dataset candidate lists and panels assessed by Panelomix

| 20 week dataset | Top 17 rank FC and PLSDA | Top 20 rank MWU | Panel A FC/PLSDA | Panel B FC/PLSDA | Panel C MWU |
|-----------------|--------------------------|-----------------|------------------|------------------|-------------|
| CASES           | 19                       | 11              | 6                | 12               | 0.3         |
| CONTROLS        | 18                       | 11              | 4                | 8                | 0.6         |
| OVERALL         | 18                       | 11              | 5                | 10               | 0.5         |

**Abbreviations:**

AA: Amino Acids;  
 AG: Acyl Glycines;  
 AK: Amino Ketones;  
 ALC: Alcohols;  
 ALD: Aldehydes;  
 ARA: Aromatic Acids;  
 BA: Bile Acid;  
 CAT & D: Catecholamines and Derivatives;  
 C21-STR: C-21 Steroids  
 DA: Dicarboxylic Acids;  
 DIAG: Diacylglycerophosphoinositols;  
 FA: Fatty Acid;  
 FALD: Fatty Aldehydes;  
 GLU: Gluconorides;  
 GLP: Glycerolipids;  
 HA: Hydroxy Acids;  
 HFA: Hydroxy Fatty Acids;  
 IND: Indoles;  
 ISO: Isoprenoids  
 MOAG: Monoacylglycerophosphoglycerols  
 NA: Nucleic Acids;  
 N\_ACLA: N\_Acyl Amines;  
 N\_GLSP: Neutral glycosphingolipids;  
 NUC: Nucleotides;  
 OCT: Octadecanoids;  
 PA: Polyamines;  
 PG: Prostaglandin;  
 PL: Phospholipids;  
 PO: Polyols  
 PP: Polypeptides;  
 PTR: Pterins;  
 PUR: Purines;  
 SP: Sugar Phosphates;  
 STG: Stigmasterols;

STR: Steroids;  
 SPM: Sphingomyelins;  
 VITD: Vitamin D and derivatives;

Table S6. Logistic Regression performed in Panelomix for the panels of biomarkers

| Panel   | Dataset<br>(GA in weeks) | Selection method | % missing values | # features in final panel | pAUC              | % Specificity<br>(95%CI) |                     |
|---------|--------------------------|------------------|------------------|---------------------------|-------------------|--------------------------|---------------------|
| Panel A | 20                       | FC               | 4                | 5                         | 9.2<br>(4.0-15.1) | 70.9<br>(52.7-78.2)      | 79.6<br>(67.3-89.8) |
| Panel B | 20                       | MWU              | 0.5              | 5                         | 10.9 (6.9–14.9)   | 54.5<br>(41.8–67.3)      | 85.7<br>(75.5–93.9) |
| Panel C | 15                       | FC and VIP       | 4                | 4                         | 8.1<br>(4.9–11.9) | 41.1<br>(28.6–53.6)      | 85.7<br>(75.5–93.9) |
| Panel D | 15                       | MWU              | 3                | 4                         | 8.9<br>(5.1–13.7) | 62.5<br>(50.0–75.0)      | 75.5<br>(63.3–87.8) |
